# Supplementary material for: Evaluating hippocampal replay without a ground truth
Source: eLife journal article supplement (doi:10.7554/elife.85635), 2024-11-28
Supplement: supp [file elife-85635-supp-v1.zip]

Alpha level = 0.05

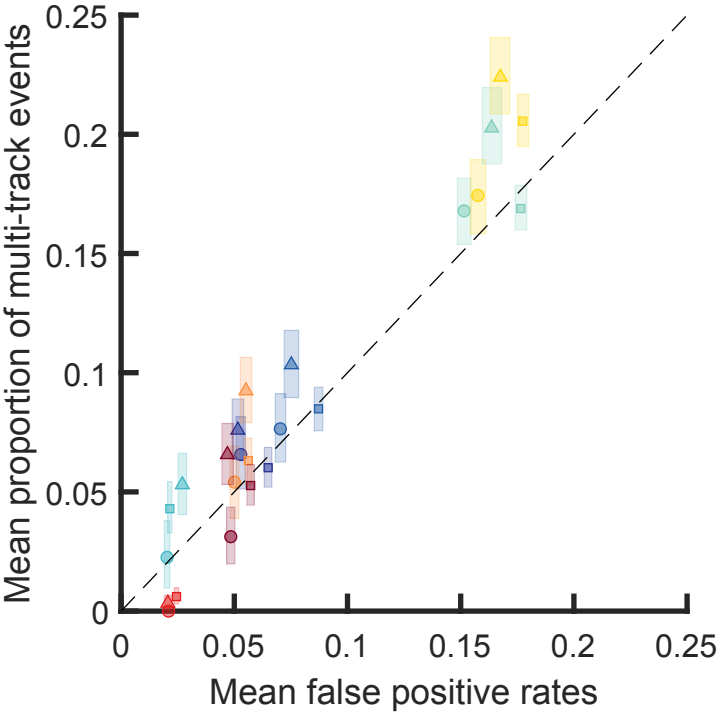

● PRE  
▲ RUN  
■ POST

wcorr 1 shuffle  
wcorr 1 shuffle + jump distance  
wcorr 2 shuffles  
wcorr 3 shuffles  
Spearman median spike  
Spearman all spike  
linear 1 shuffle  
linear 2 shuffles
