# Supplementary material for: Evaluating hippocampal replay without a ground truth
Source: eLife journal article supplement (doi:10.7554/elife.85635), 2024-11-28
Supplement: supp [file elife-85635-supp-v1.zip]

**A**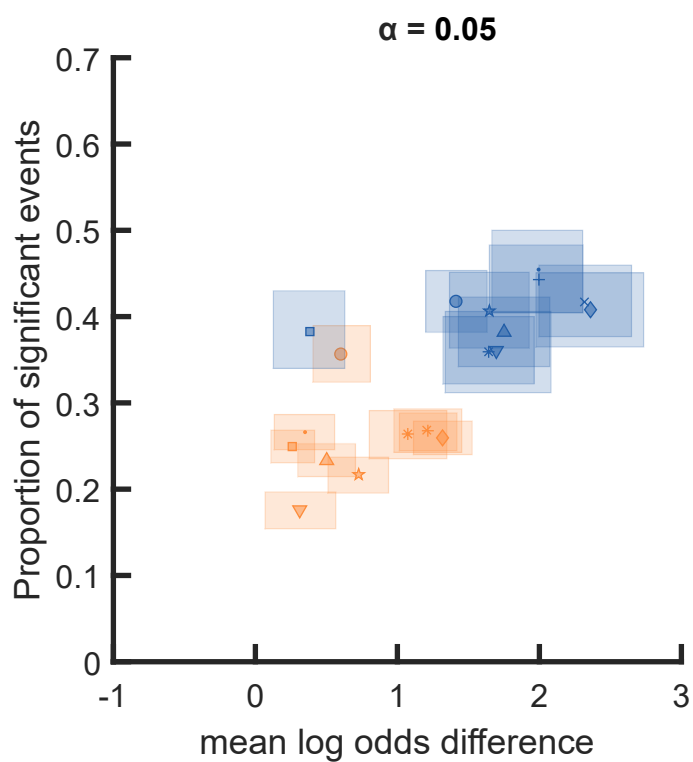**B**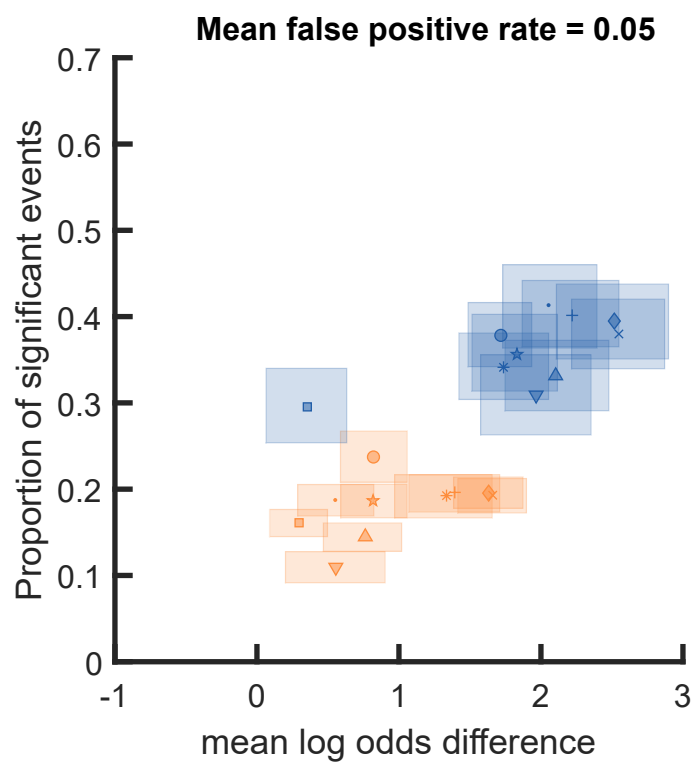

- |                   |                   |
|-------------------|-------------------|
| ● Rat 1 session 1 | ■ Rat 4 session 1 |
| + Rat 2 session 1 | ◆ Rat 4 session 2 |
| * Rat 2 session 2 | ▲ Rat 4 session 3 |
| • Rat 3 session 1 | ▼ Rat 5 session 1 |
| × Rat 3 session 2 | ★ Rat 5 session 2 |

■ RUN  
■ POST
