# Supplementary material for: Evaluating hippocampal replay without a ground truth
Source: eLife journal article supplement (doi:10.7554/elife.85635), 2024-11-28
Supplement: supp [file elife-85635-supp-v1.zip]

High  
sequence  
fidelity

Session 7 Event 3265 Track 1 sequence

P value = 0.01

Z-scored log odds = 0.22

Track 1

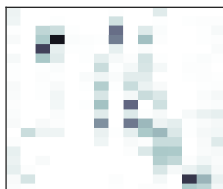

Track 2

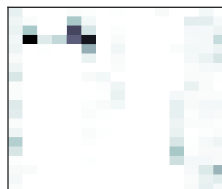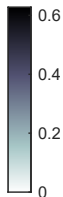

Session 7 Event 1630 Track 1 sequence

P value = 0.02

Z-scored log odds = 2.81

Track 1

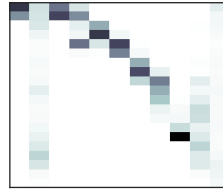

Track 2

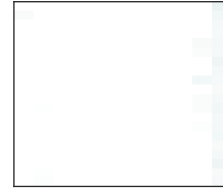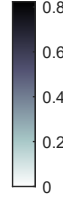

Low  
sequence  
fidelity

Session 7 Event 4056 Track 1 sequence

P value = 0.33

Z-scored log odds = 0.41

Track 1

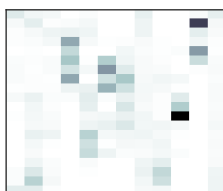

Track 2

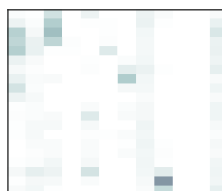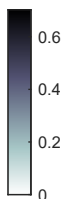

Session 7 Event 3737 Track 1 sequence

P value = 0.35

Z-scored log odds = 2.30

Track 1

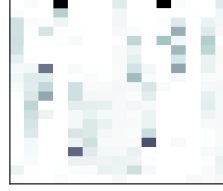

Track 2

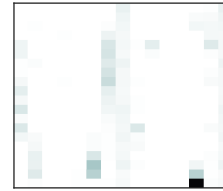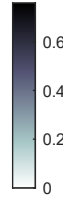

Low  
reactivation bias

High  
reactivation bias
