# Supplementary material for: Evaluating hippocampal replay without a ground truth
Source: eLife journal article supplement (doi:10.7554/elife.85635), 2024-11-28

## Candidate Replay events thresholded by a lower speed threshold

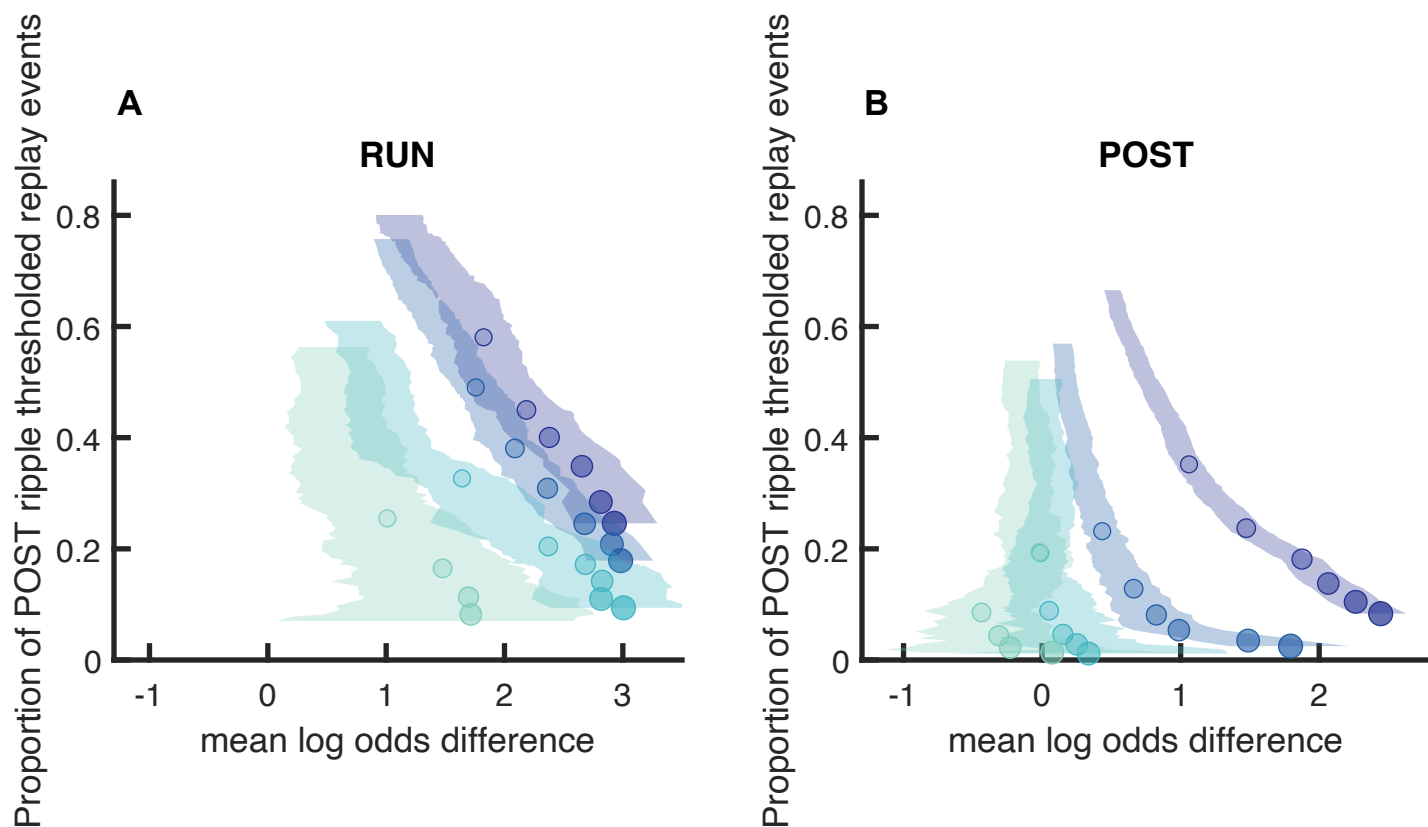

## Candidate Replay events thresholded by low theta power

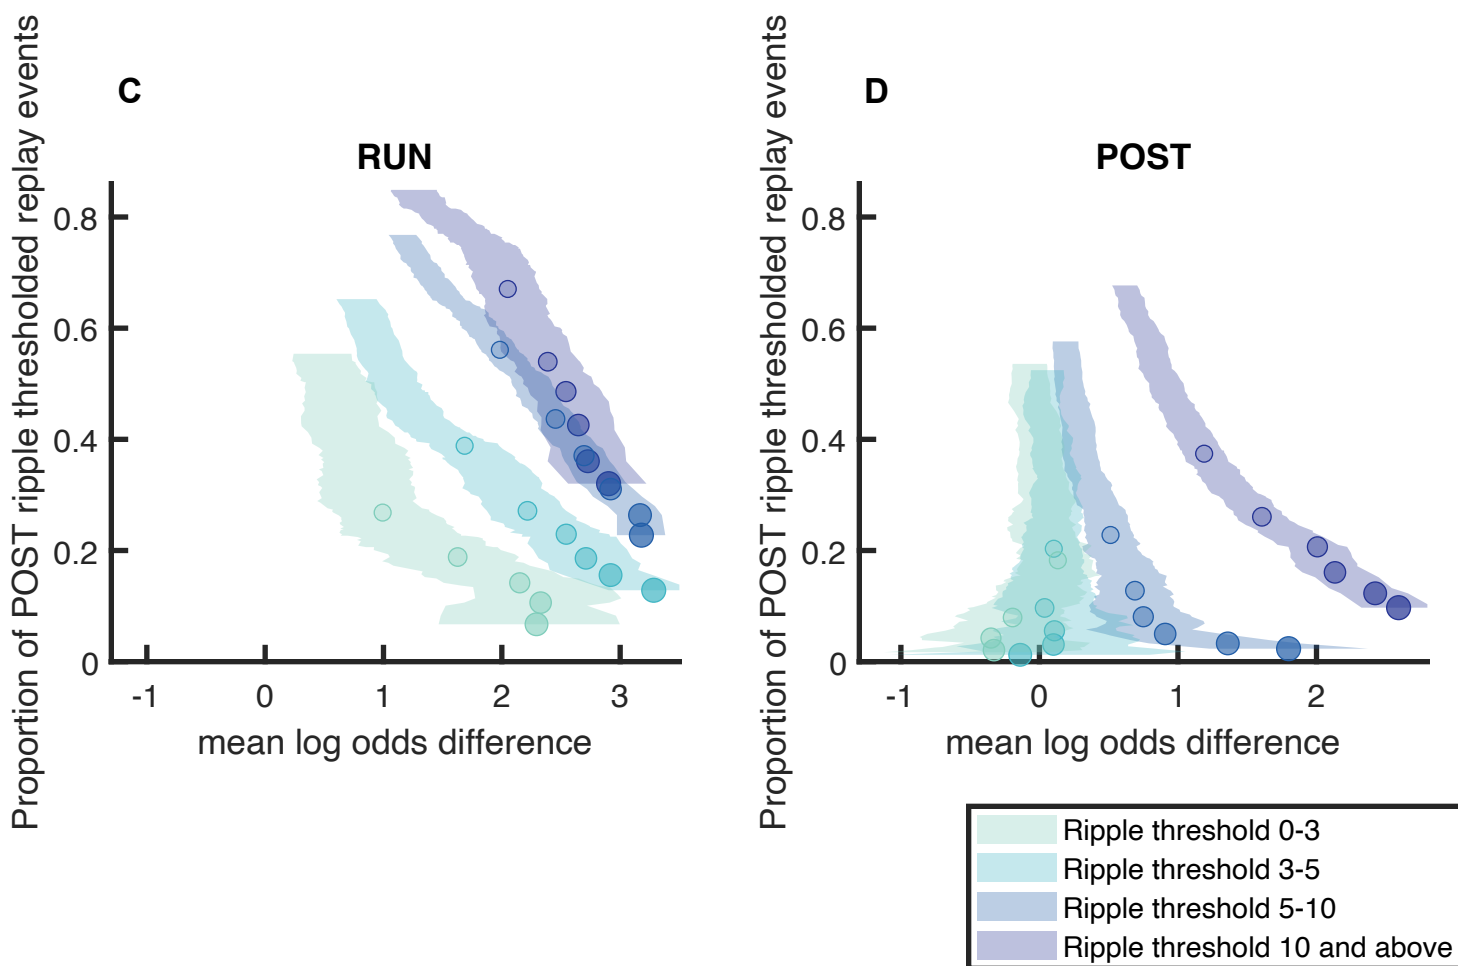

Supplement: supp [file elife-85635-supp-v1.zip]
