# Supplementary material for: Evaluating hippocampal replay without a ground truth
Source: eLife journal article supplement (doi:10.7554/elife.85635), 2024-11-28
Supplement: supp [file elife-85635-supp-v1.zip]

**A**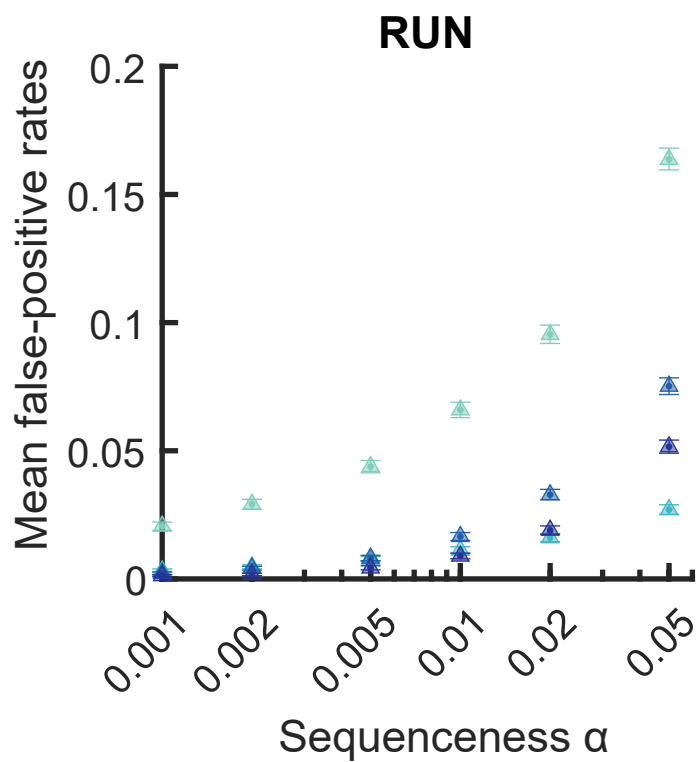**B**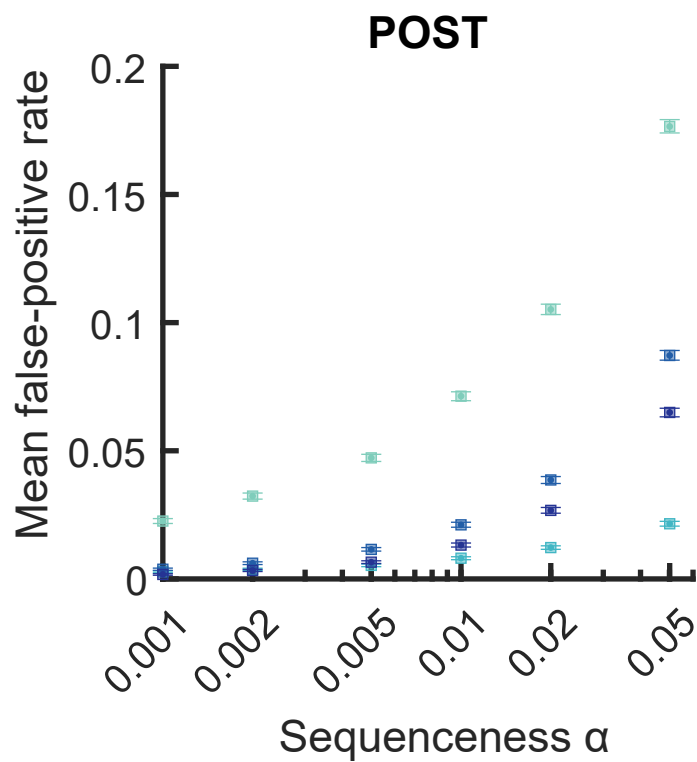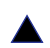**RUN**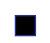**POST**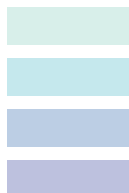

POST Place

POST Place + jump distance

PRE place + POST time

PRE place + PRE spike + POST Place
