# Supplementary figures and images for: Evaluating hippocampal replay without a ground truth
Source: eLife journal article supplement (doi:10.7554/elife.85635), 2024-11-28

**A**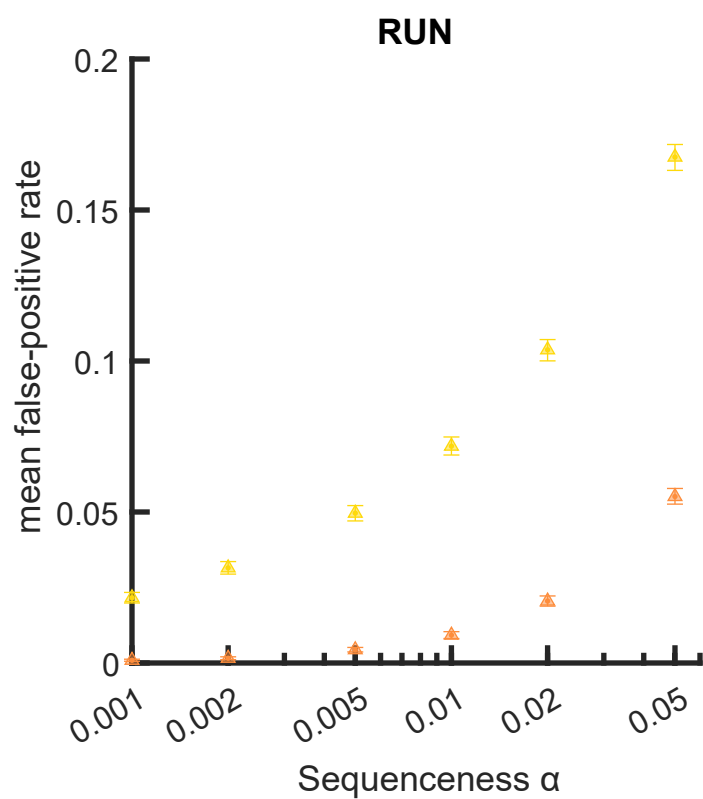**B**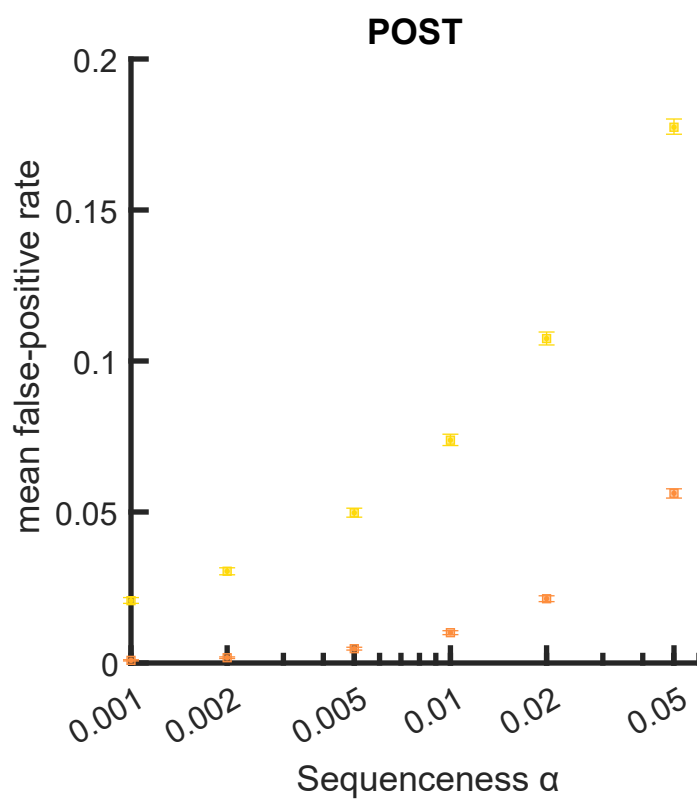

Supplement: supp [file elife-85635-supp-v1.zip]

**A**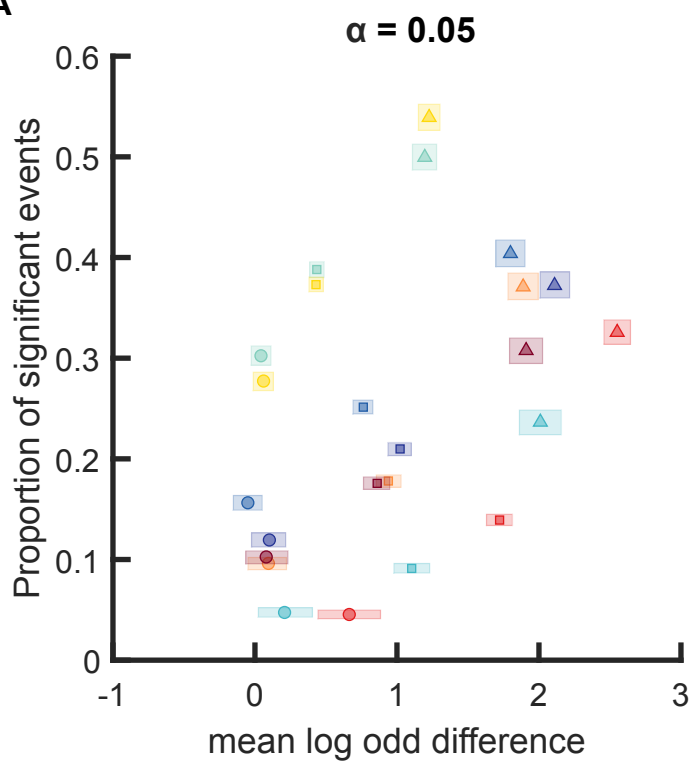**B**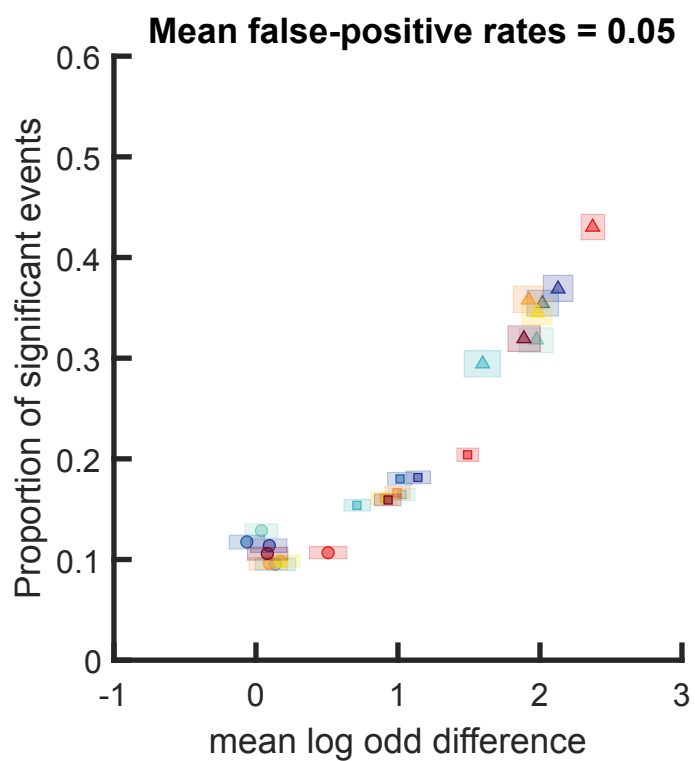

Supplement: supp [file elife-85635-supp-v1.zip]

linear 1 shuffle

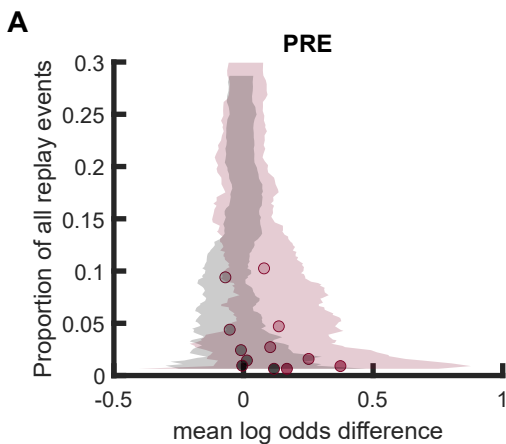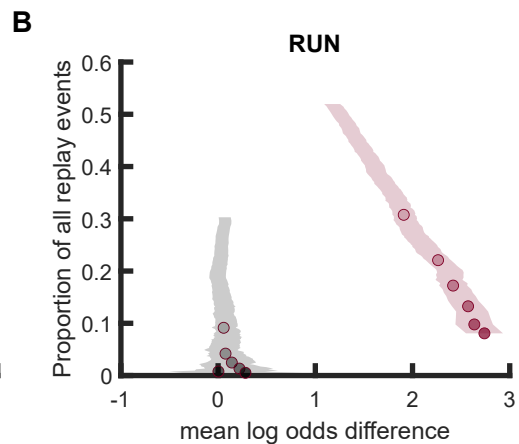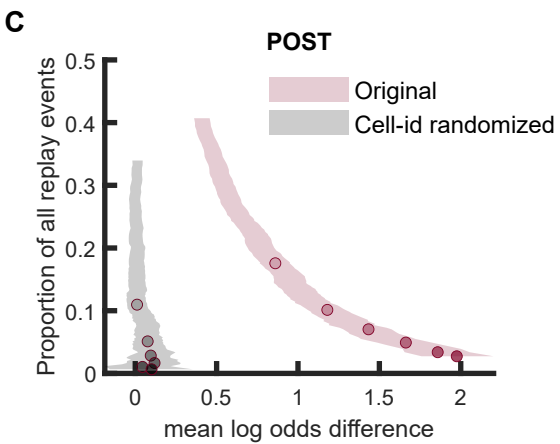

linear 2 shuffles

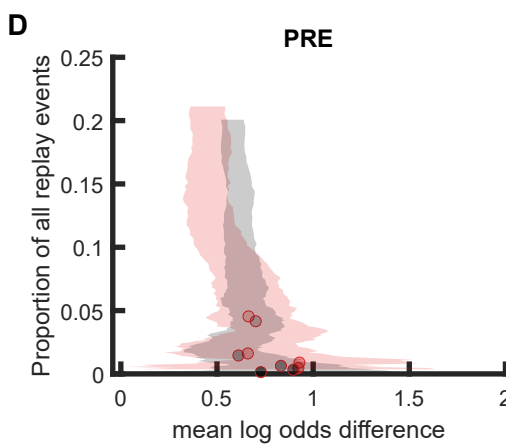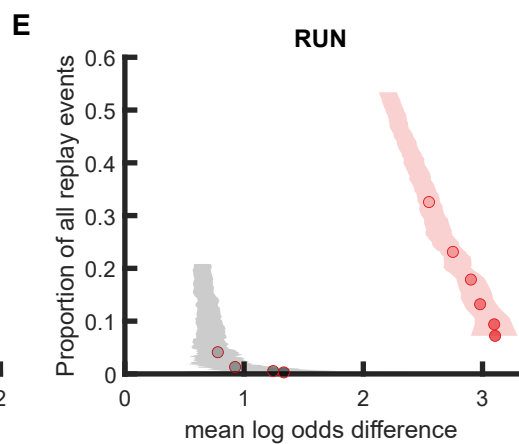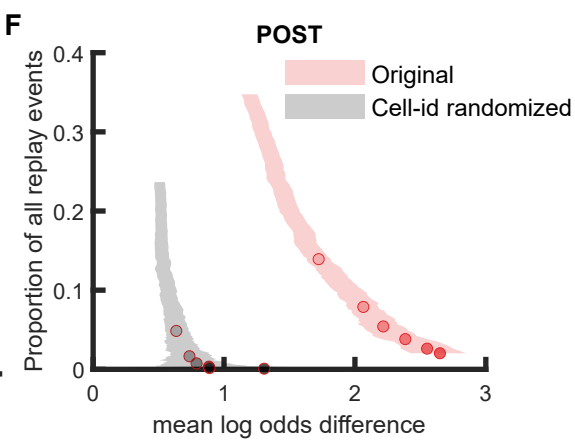

Supplement: supp [file elife-85635-supp-v1.zip]

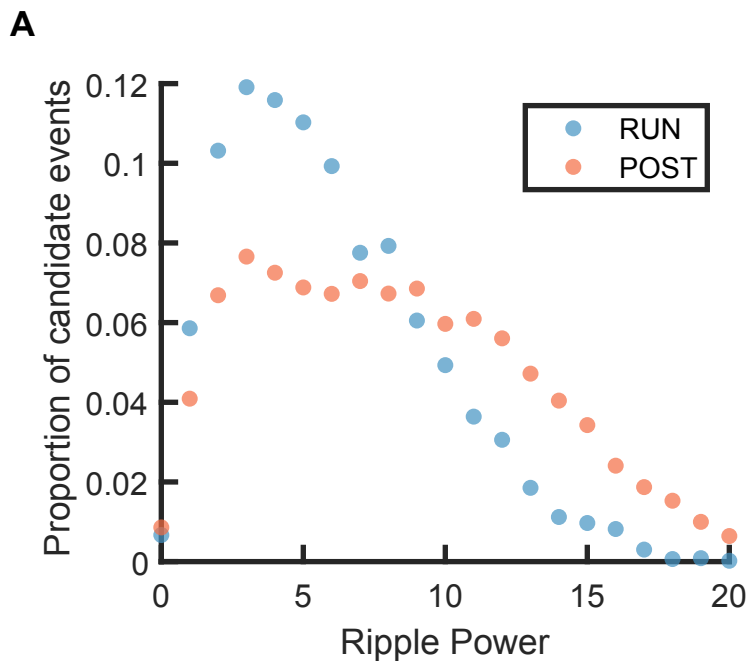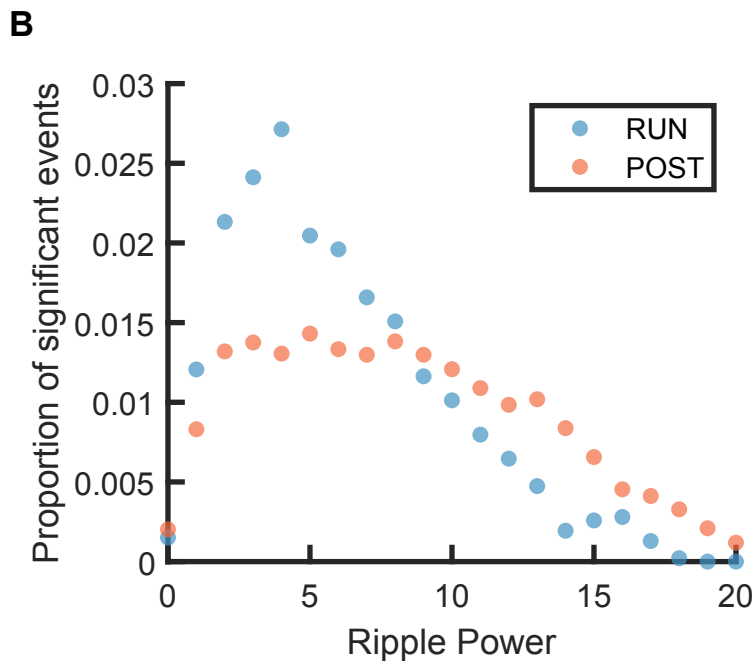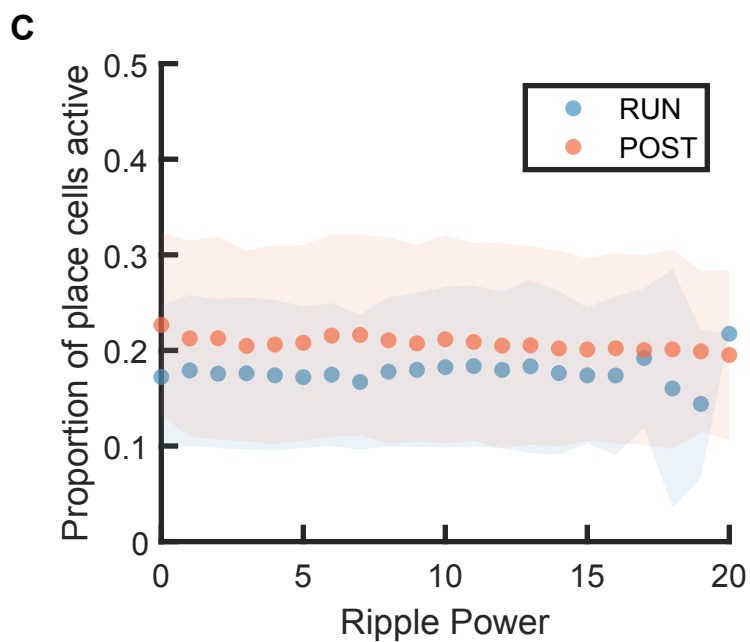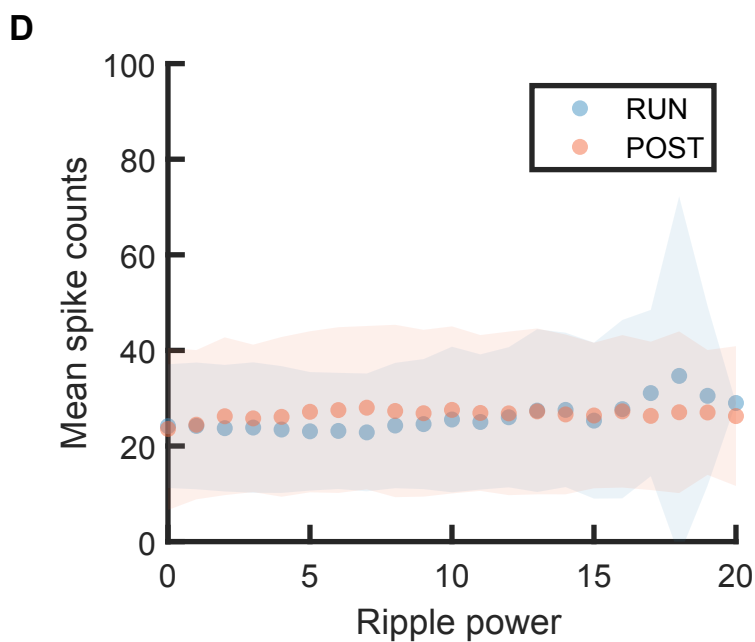

Supplement: supp [file elife-85635-supp-v1.zip]

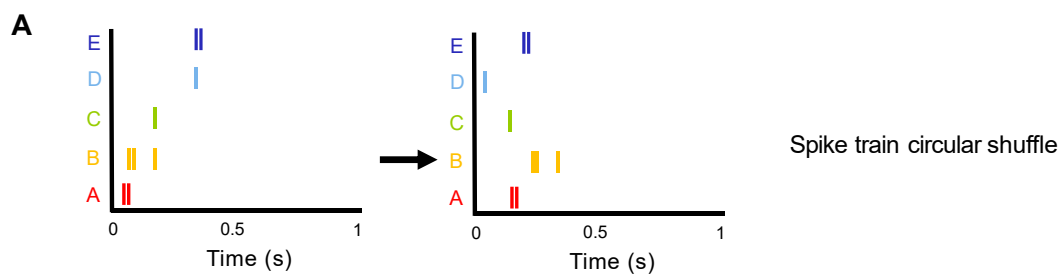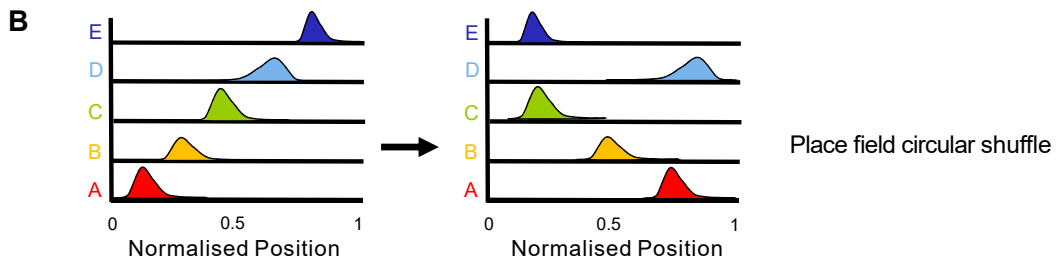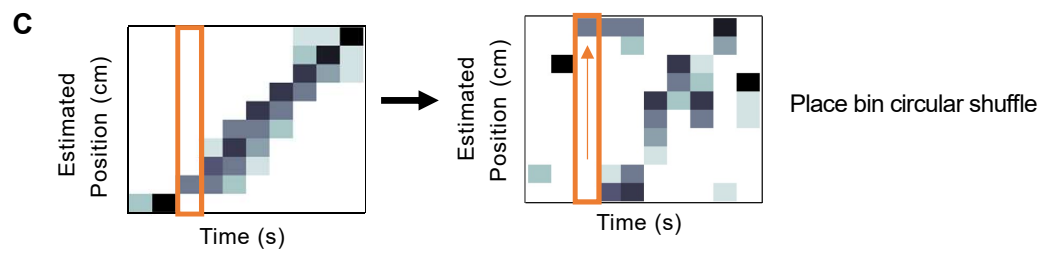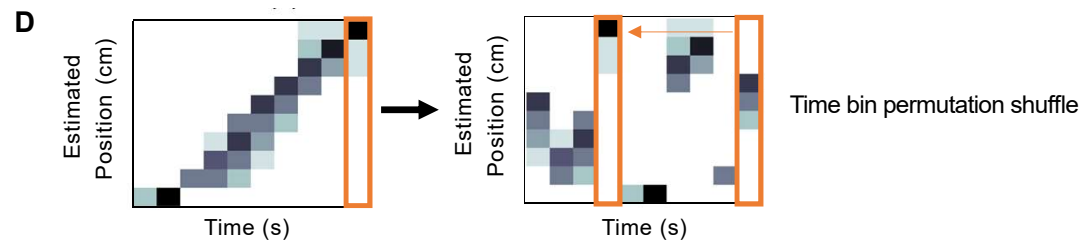

Supplement: supp [file elife-85635-supp-v1.zip]

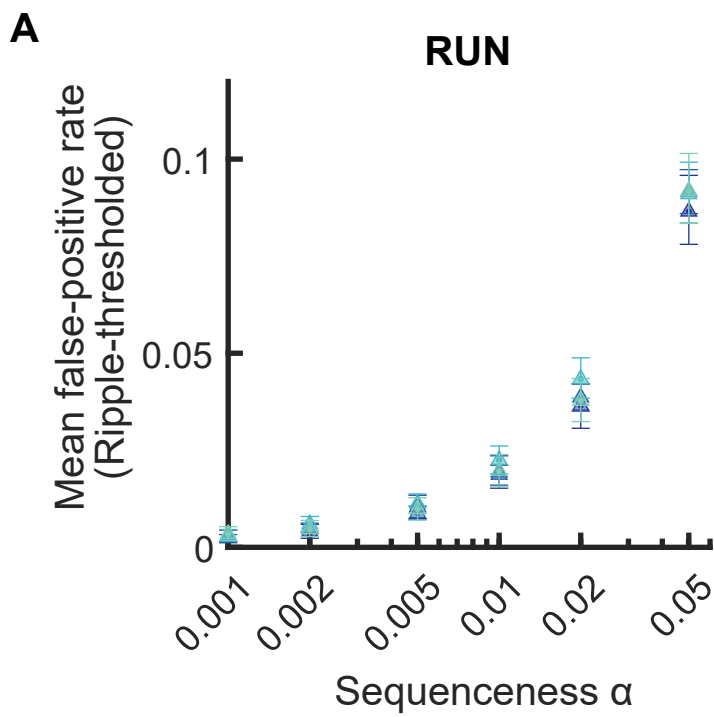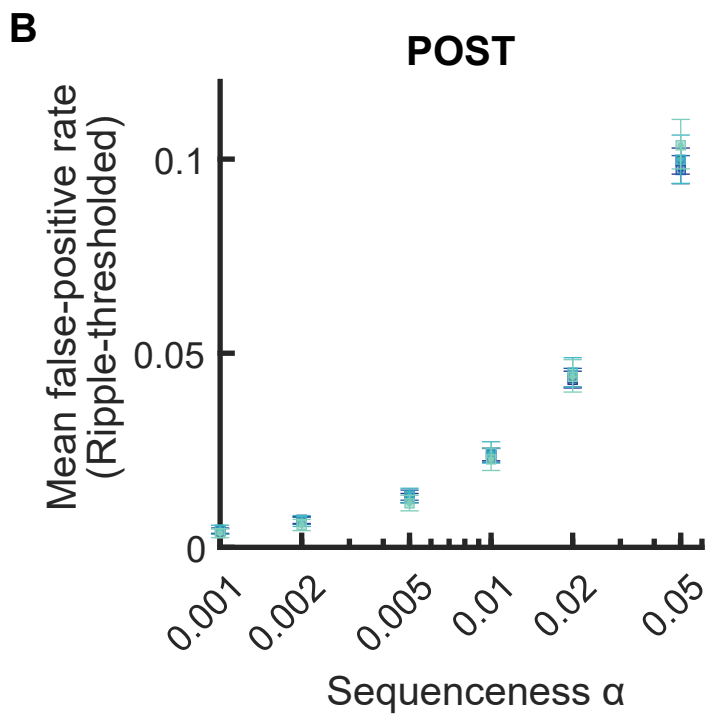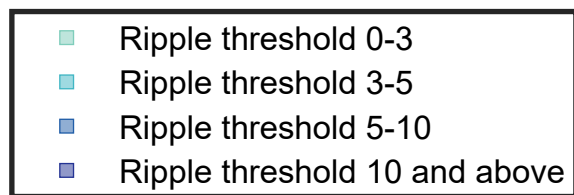

Supplement: supp [file elife-85635-supp-v1.zip]

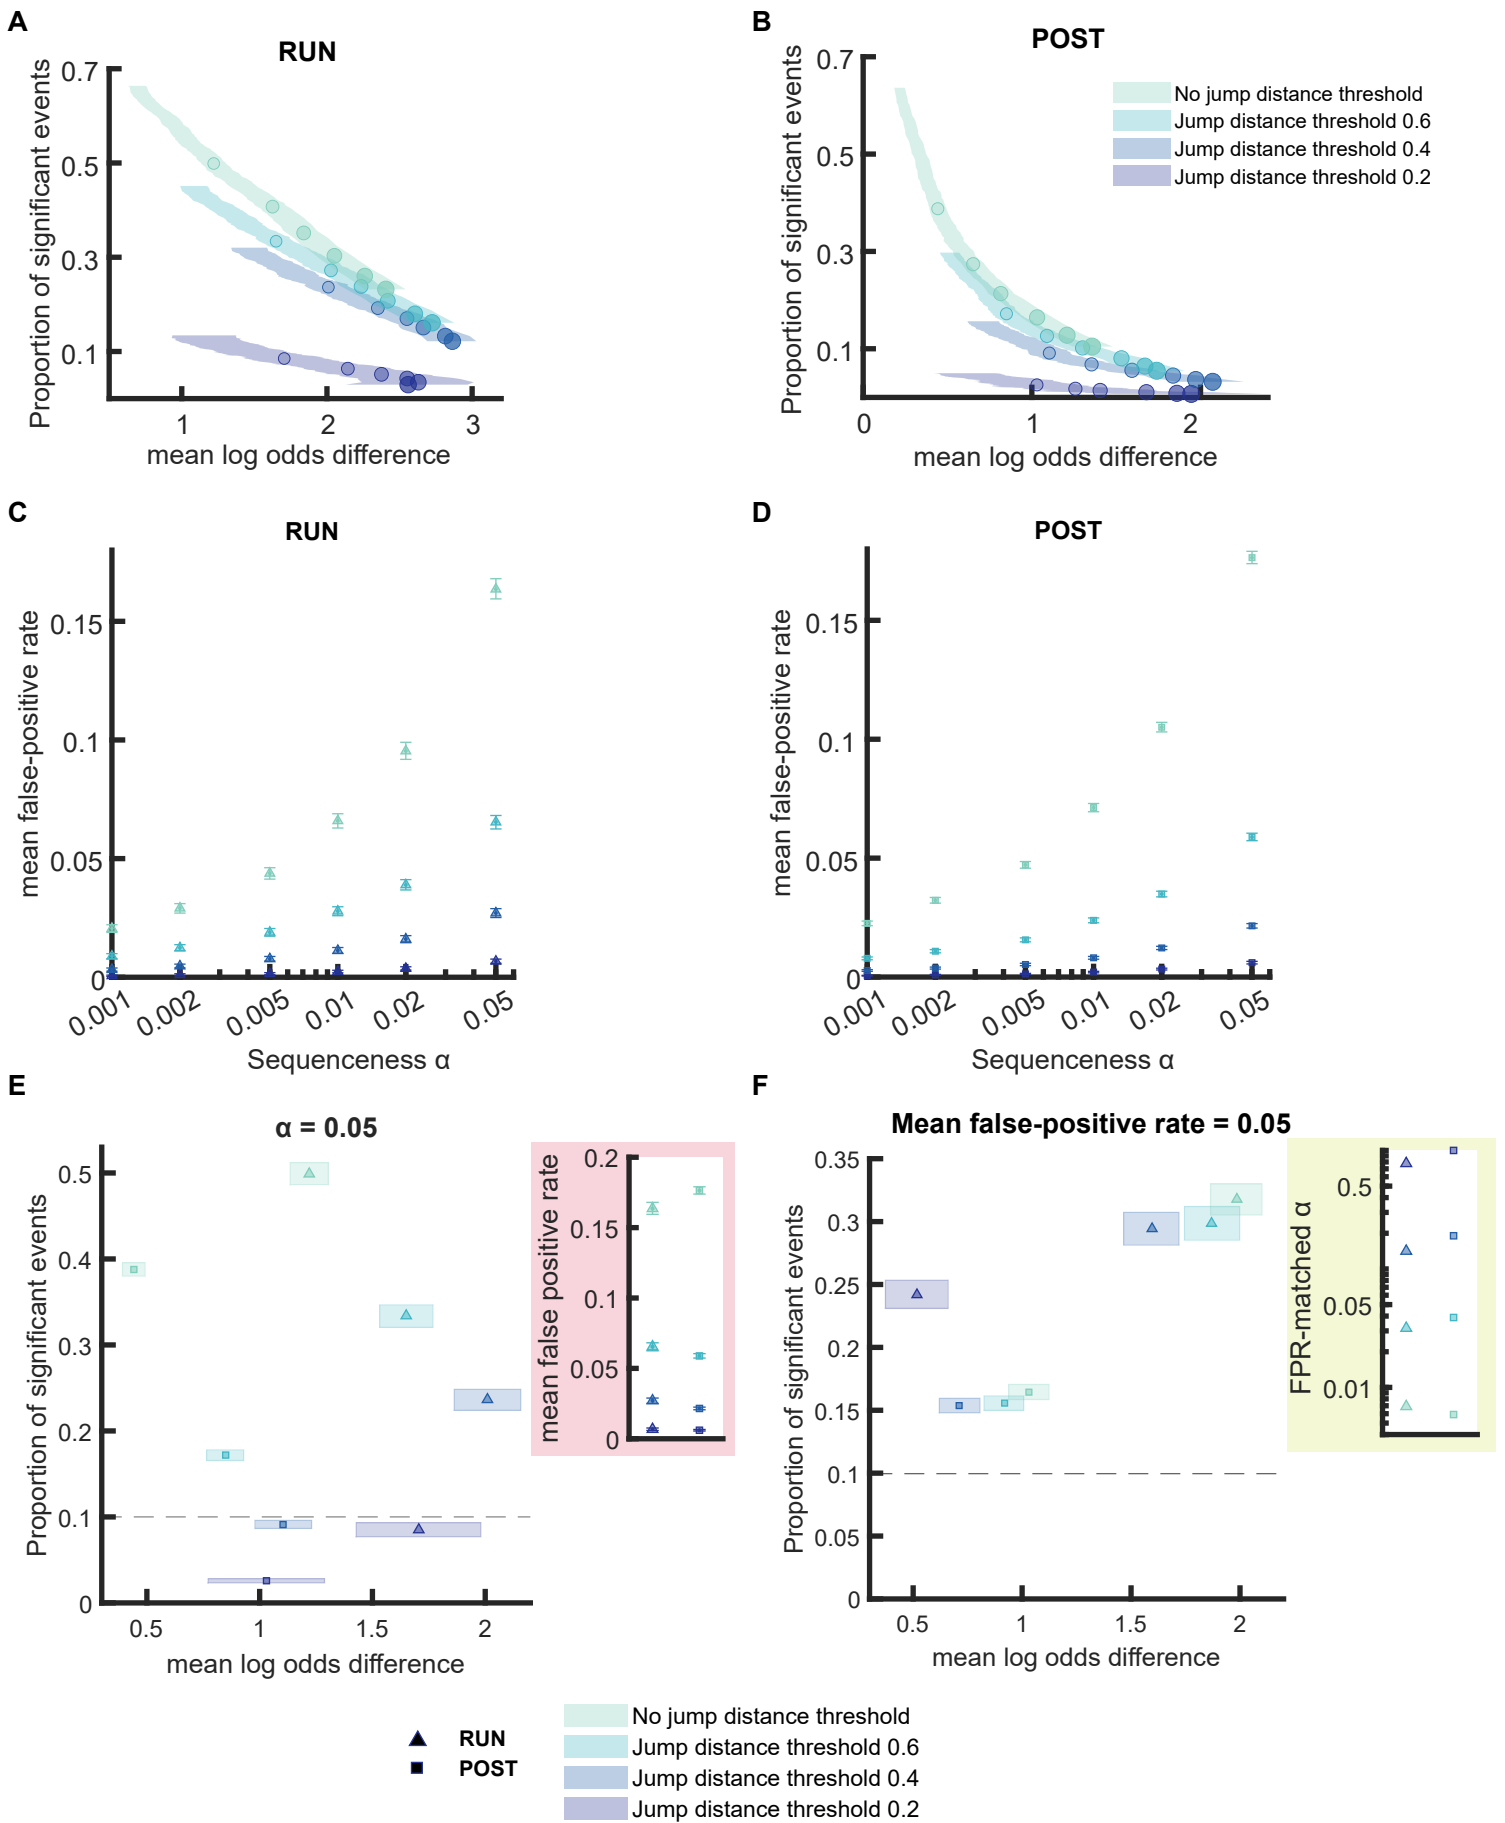

Supplement: supp [file elife-85635-supp-v1.zip]

**A**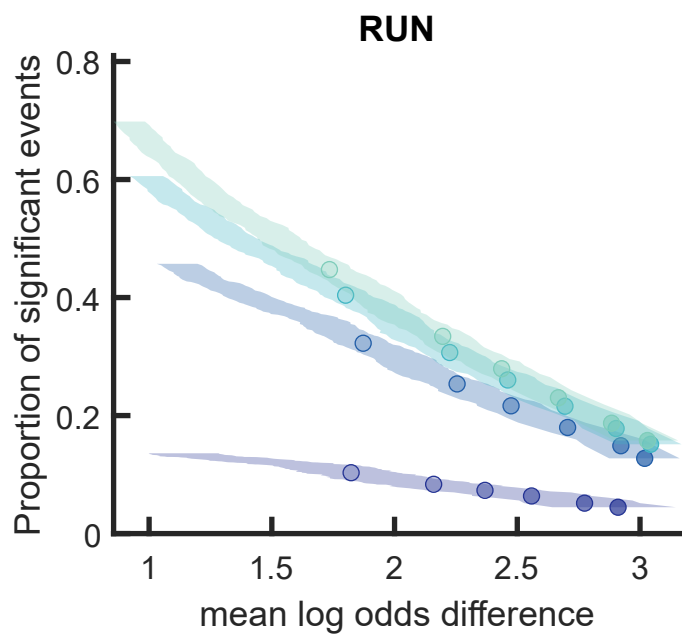**B**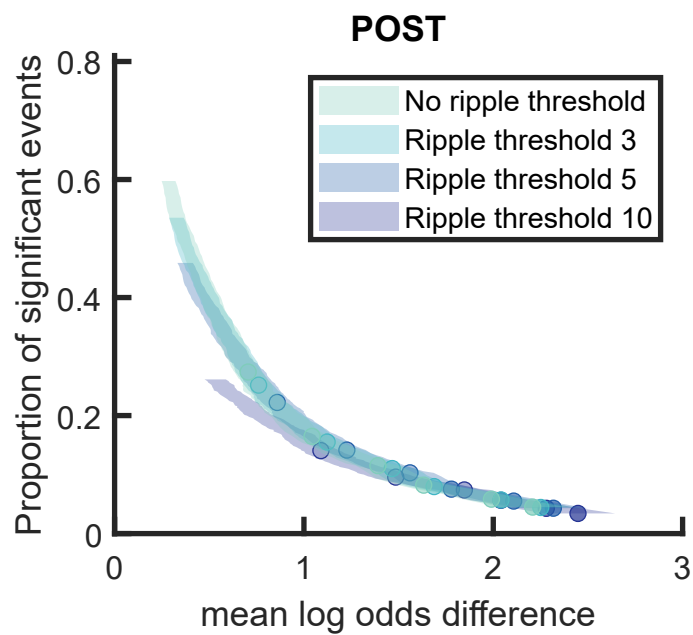**C**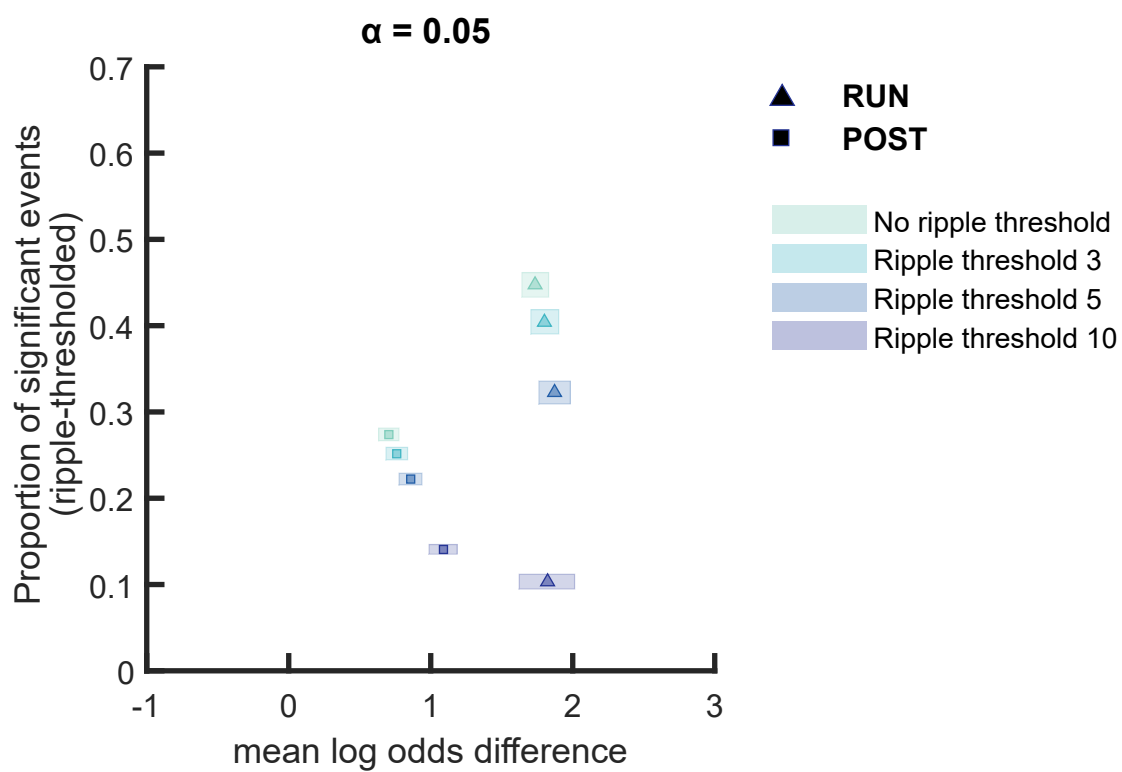

Supplement: supp [file elife-85635-supp-v1.zip]

**A**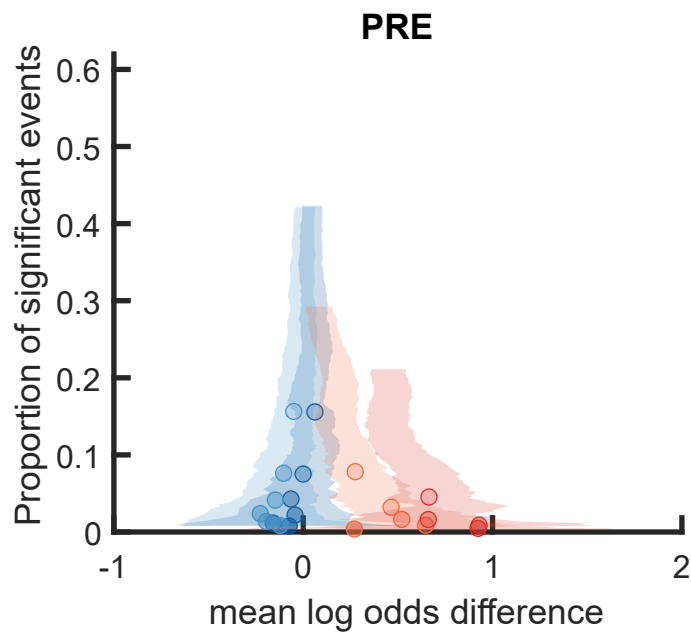**B**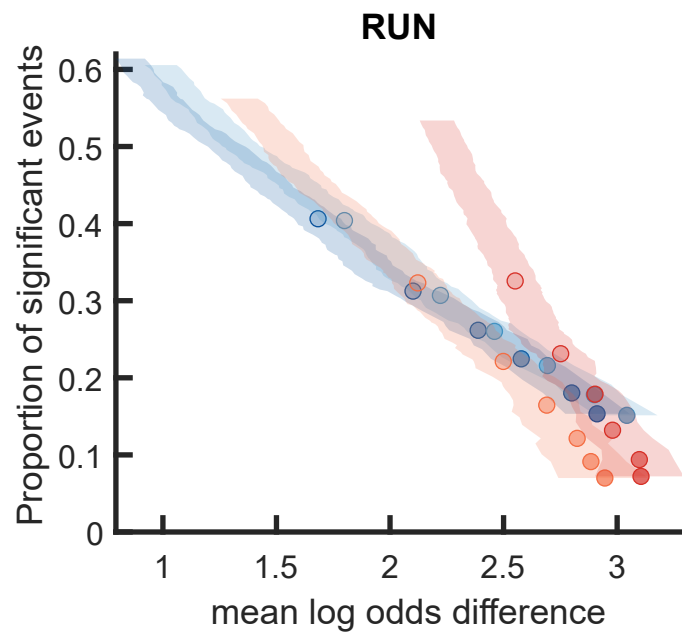**C**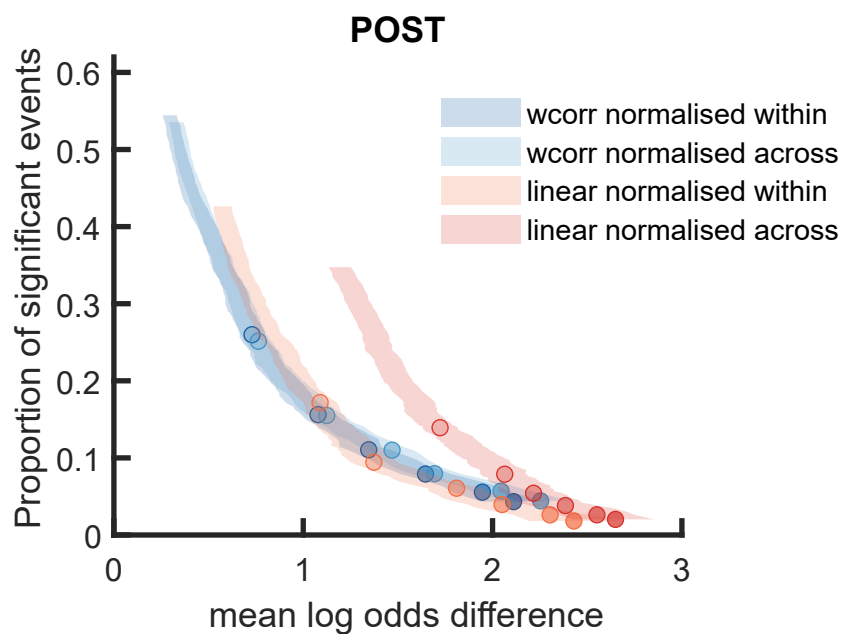

Supplement: supp [file elife-85635-supp-v1.zip]

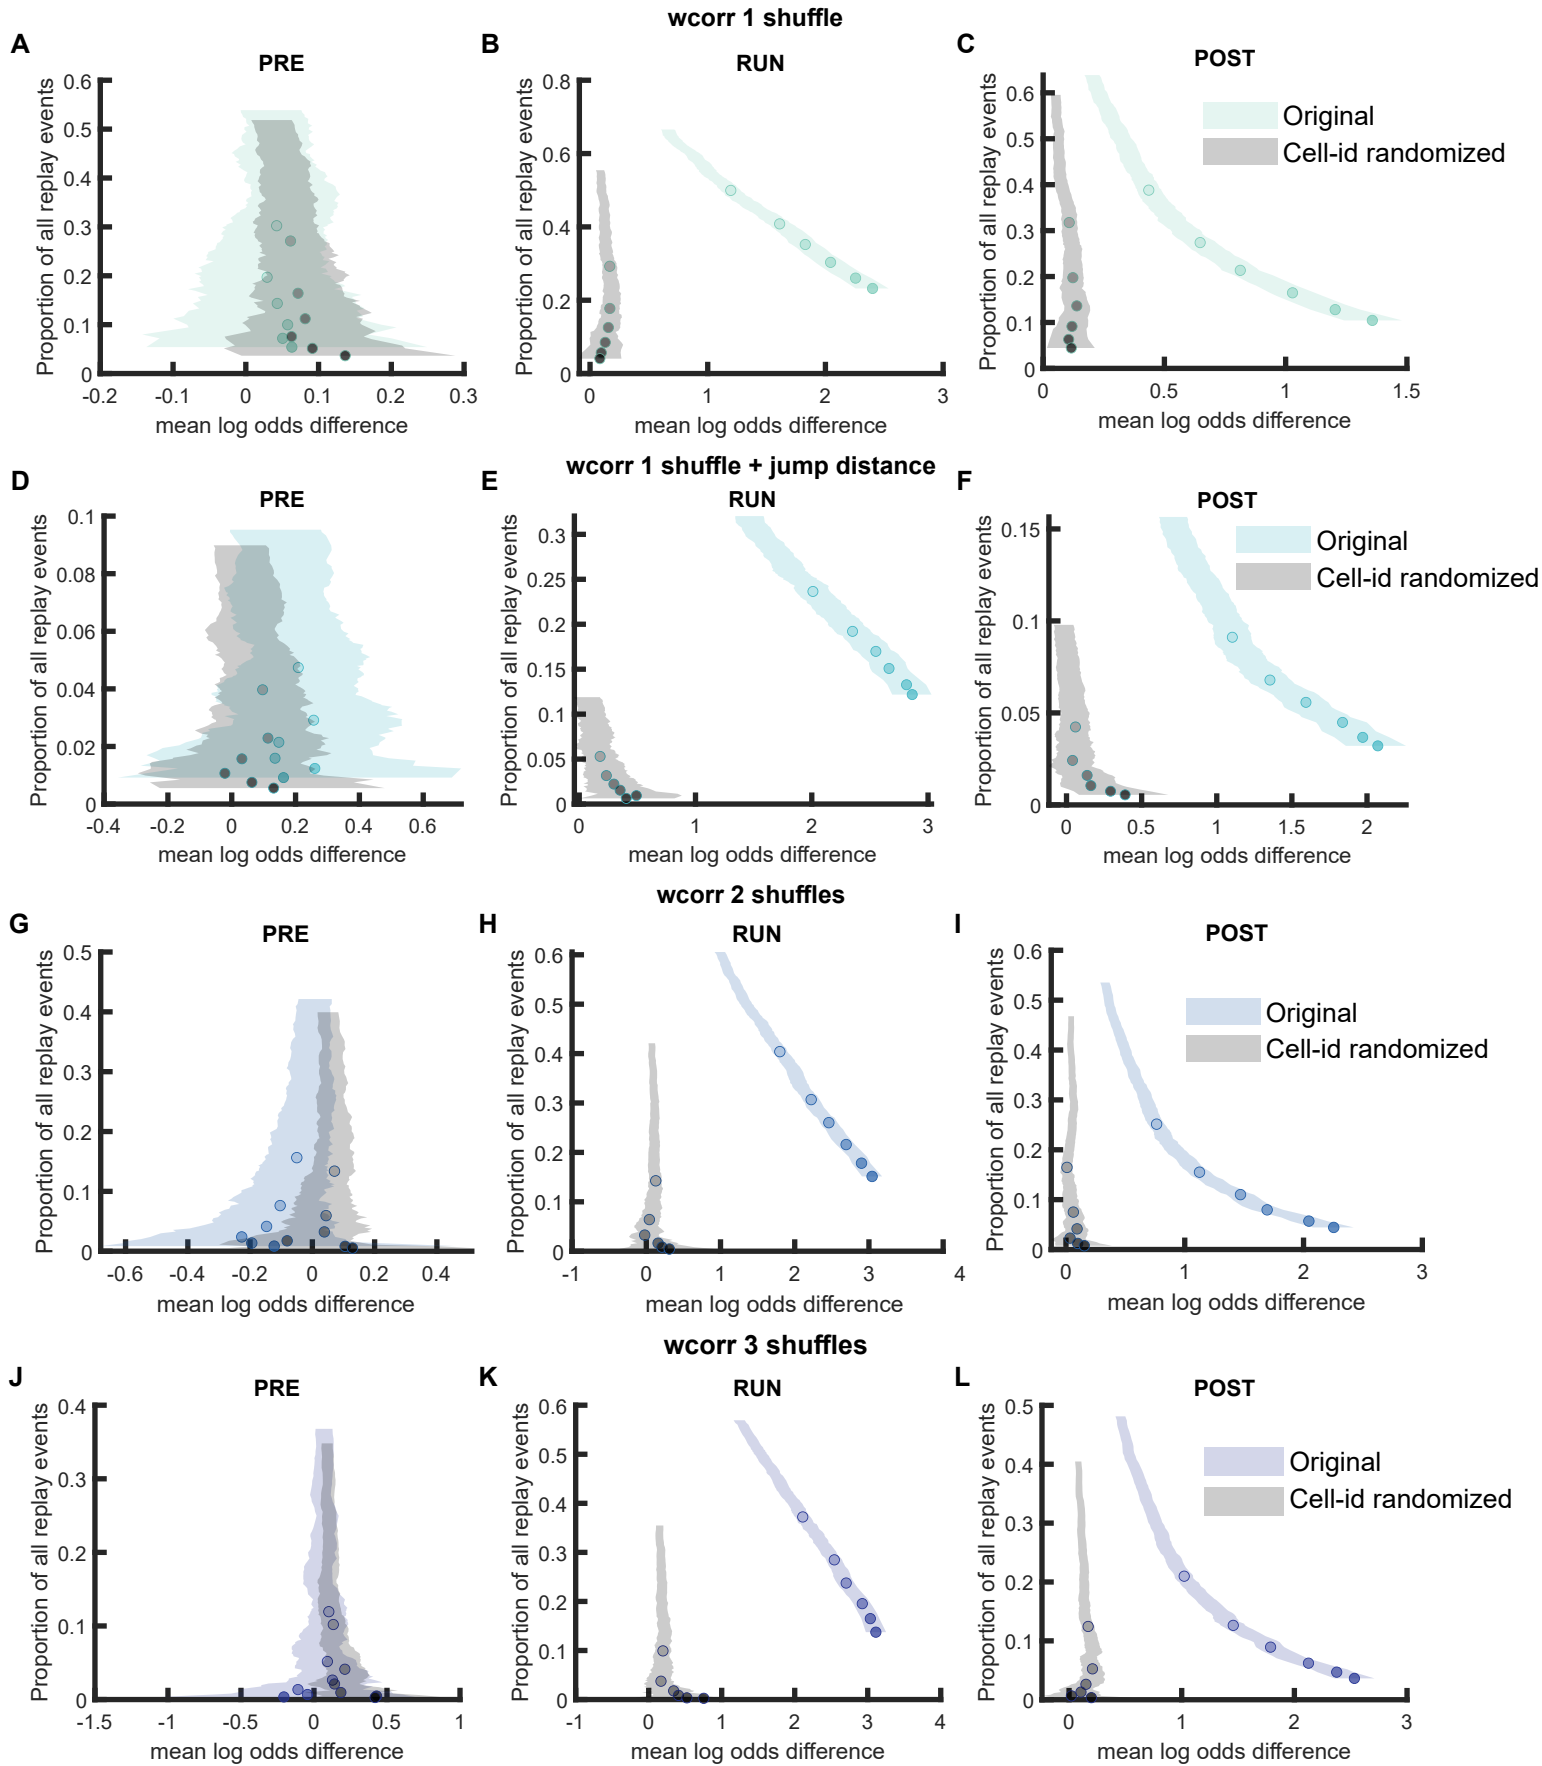

Supplement: supp [file elife-85635-supp-v1.zip]

**A****time bin shuffle**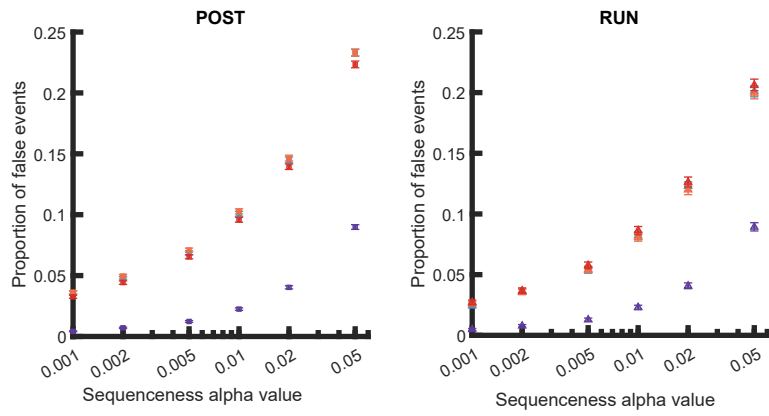**B****spike train shuffle**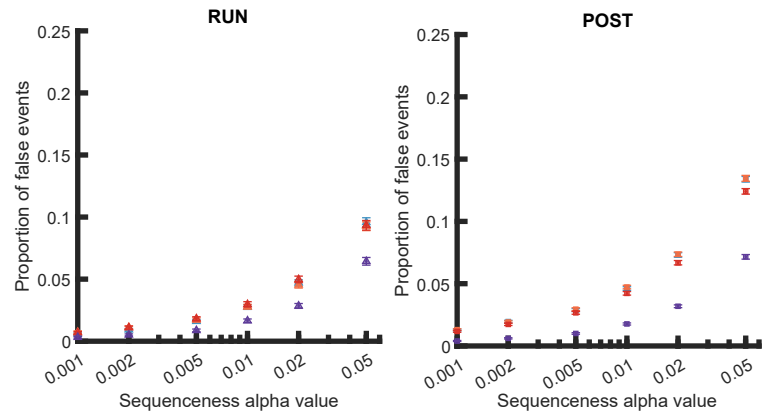**C****place field shuffle**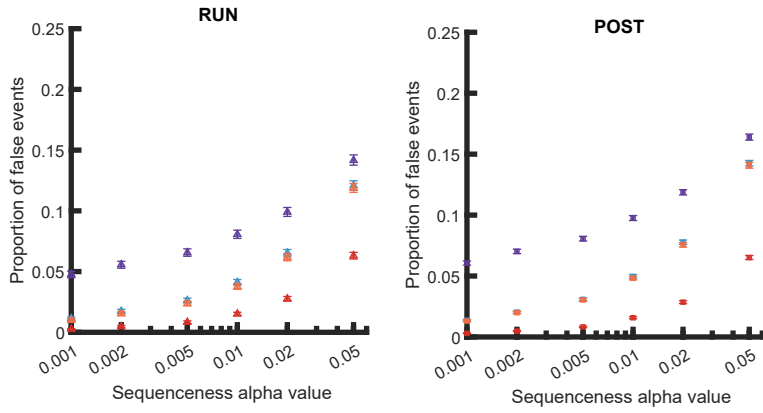**D****place bin shuffle**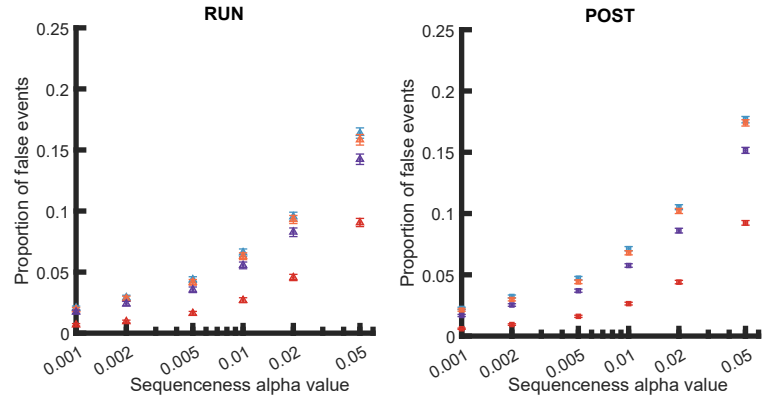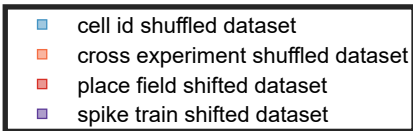

Supplement: supp [file elife-85635-supp-v1.zip]

**spearman all spikes**

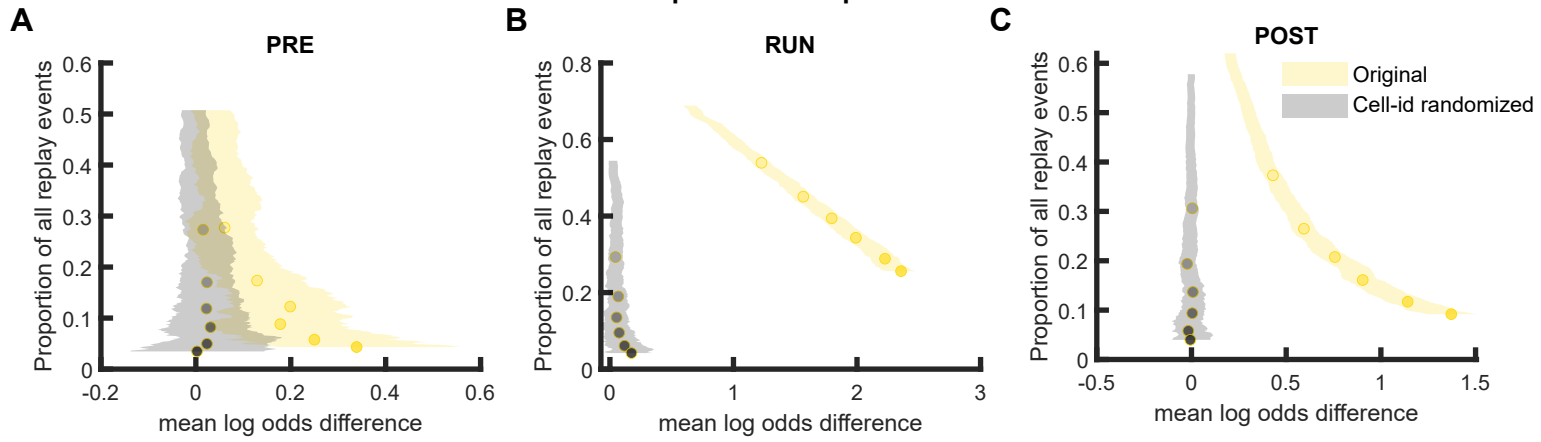

**spearman median spike**

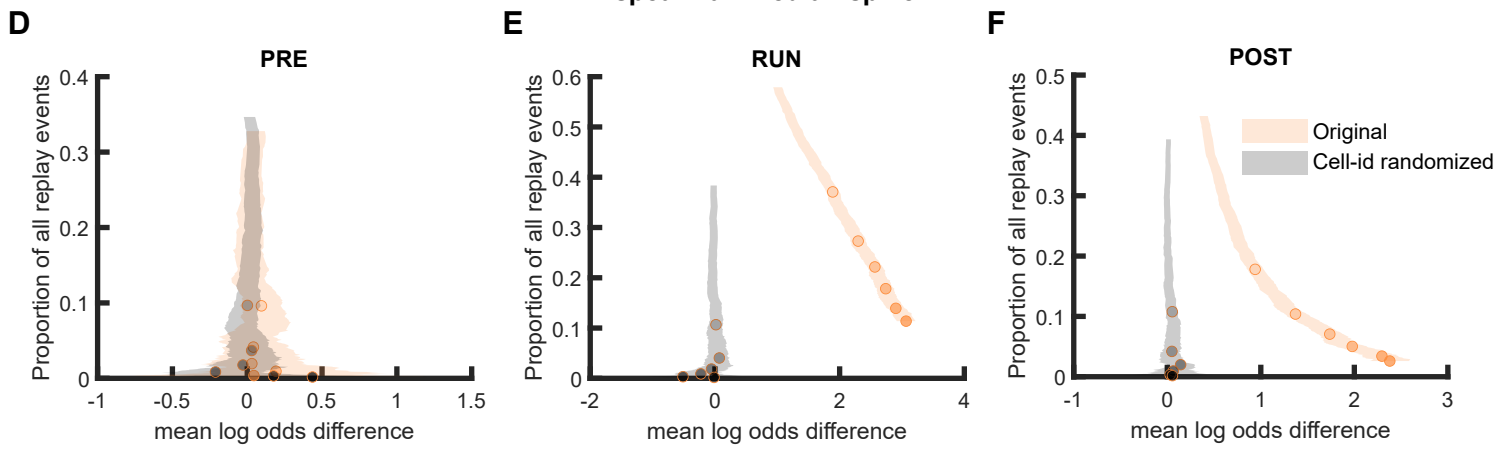

Supplement: supp [file elife-85635-supp-v1.zip]

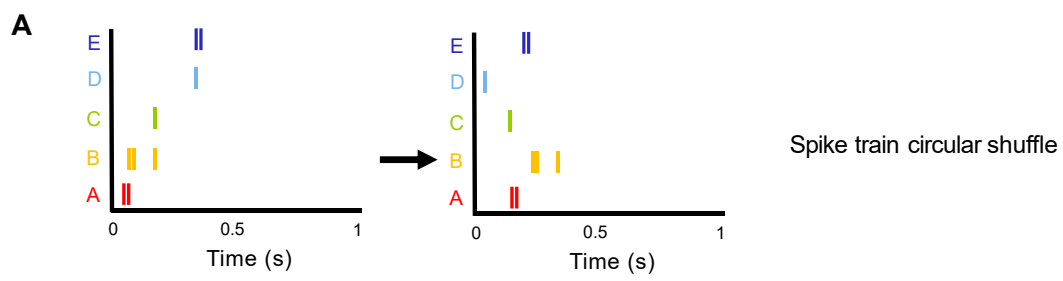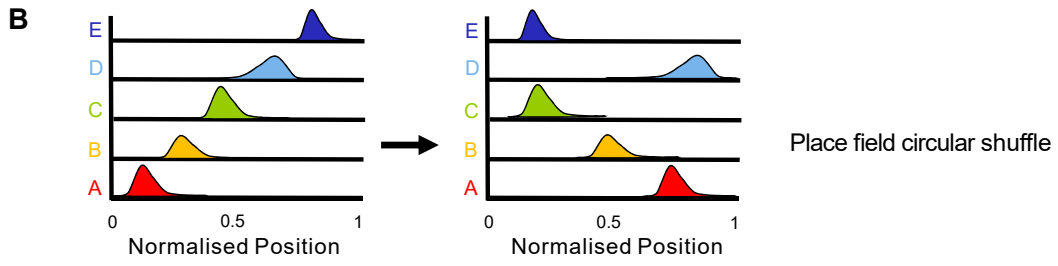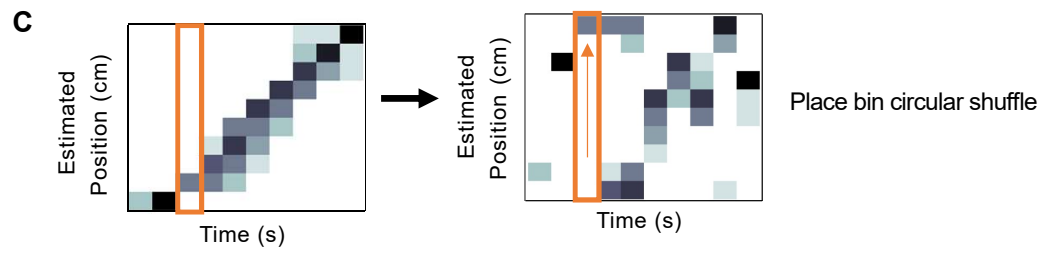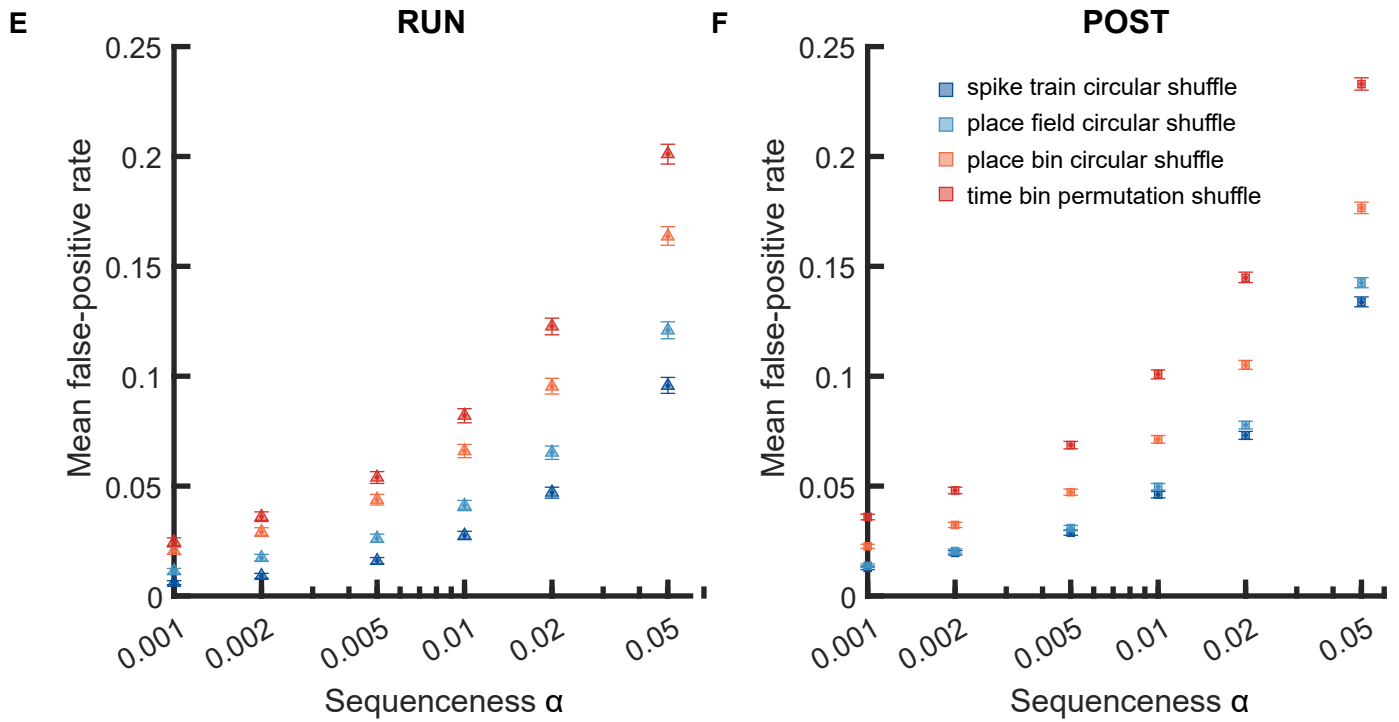

Supplement: supp [file elife-85635-supp-v1.zip]
